# Supplementary material for: Vasculogenesis in kidney organoids upon transplantation
Source: PubMed Central journal article supplement (PMC9391397; doi:10.1038/s41536-022-00237-4), 2022-08-19
Supplement: 41536_2022_237_MOESM1_ESM.pdf [file 41536_2022_237_MOESM1_ESM.pdf]

Supplementary figure 1

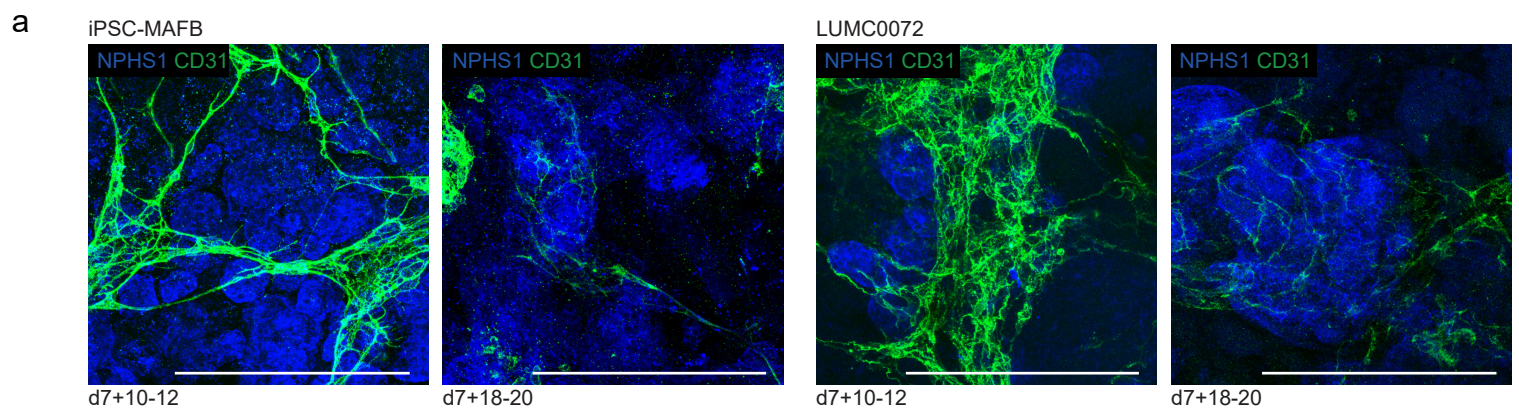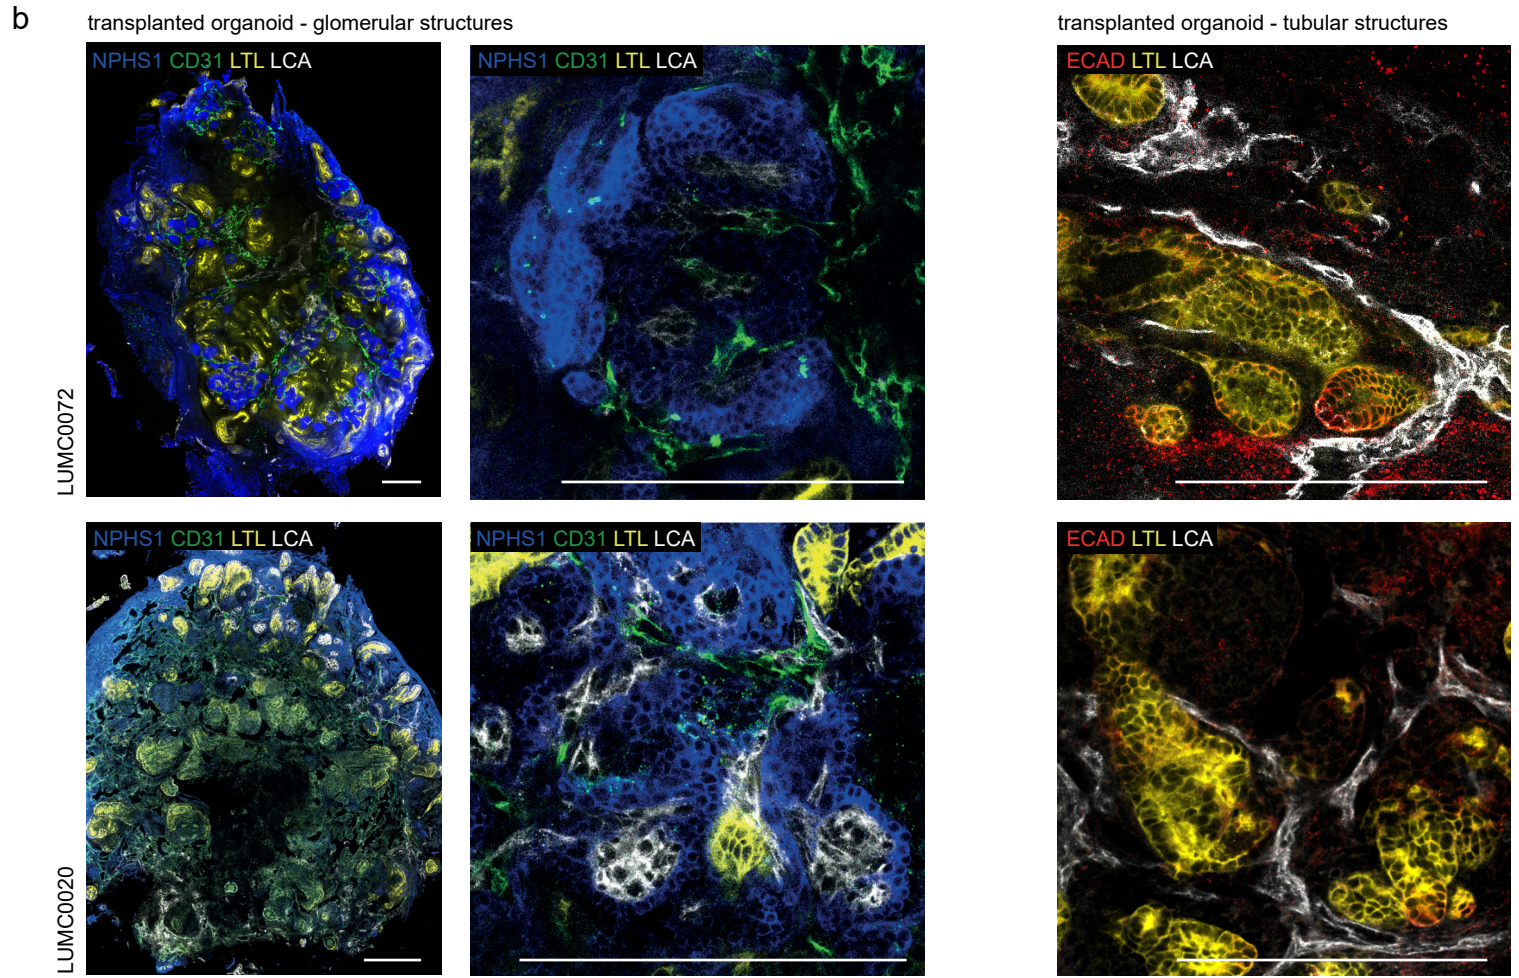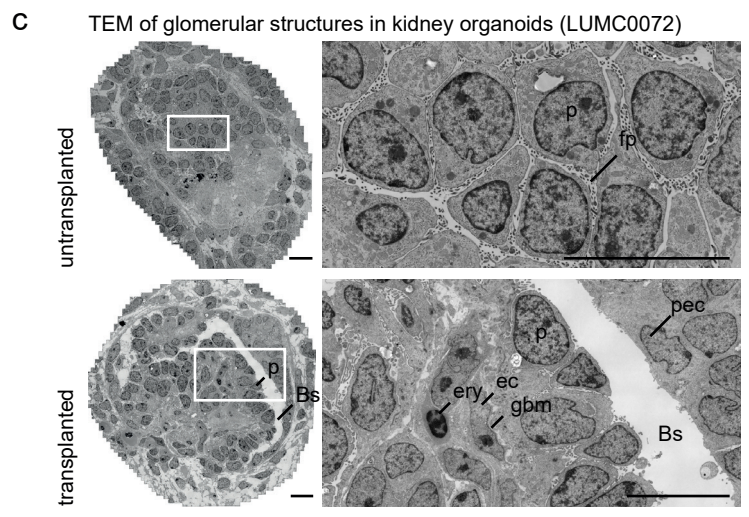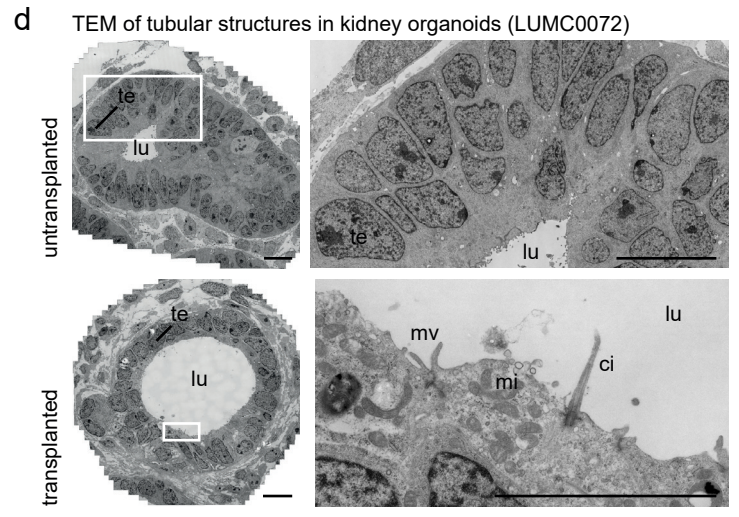

**Supplementary figure 1 – Vascularization of untransplanted and transplanted kidney organoids in multiple cell lines**

- a. Maximum projection images of Z-stacks of untransplanted kidney organoids derived from hiPSC-MAFB and LUMC0072 at d7+10-12 and d7+18-20 of differentiation. Endothelial cells are more abundant at the earlier time point. Scalebar 200µm.
- b. Kidney organoids derived from LUMC0072 and LUMC0020 are vascularized upon transplantation for 8 days. Glomerular structures (NPHS1+, blue) are invaded by perfused capillaries (LCA+, white and CD31+, green) and proximal (LTL+, yellow) and distal (ECAD+, red) tubular structures are aligned by them. Scalebar 200µm.
- c. TEM imaging of kidney organoids derived from LUMC0072 demonstrates increased maturation of glomerular structures upon transplantation for 8 days. Podocyte clusters are invaded with capillaries containing erythrocytes, parietal epithelial cells form a Bowman's capsule, a glomerular basement membrane is deposited between the podocytes and endothelial cells. *Bs* Bowman's space, *ec* endothelial cell, *ery* erythrocyte, *fp* foot process, *gbm* glomerular basement membrane, *p* podocyte, *pec* parietal epithelial cell. Scalebar 10µm.
- d. TEM imaging of kidney organoids derived from LUMC0072 demonstrates increased maturation of tubular structures. Tubular epithelial cells have formed a monolayer and their nucleus has moved toward the basolateral side of the cell. A wide tubular lumen is visible. Cilia, microvilli and abundant mitochondria are visible. *ci* cilium, *lu* lumen, *mi* mitochondrion, *mv* microvilli, *te* tubular epithelium. Scalebar untransplanted overview and magnification and transplanted overview 10µm. Scalebar transplanted magnification 5µm.

# Supplementary figure 2

**a** Human cells

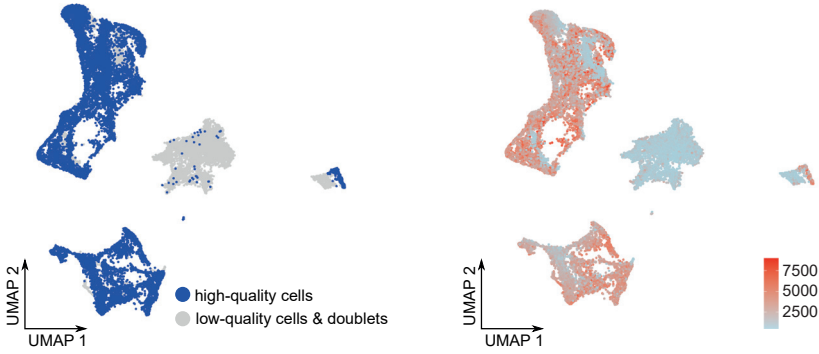

**b** Nephron progenitor cell and podocyte canonical markers

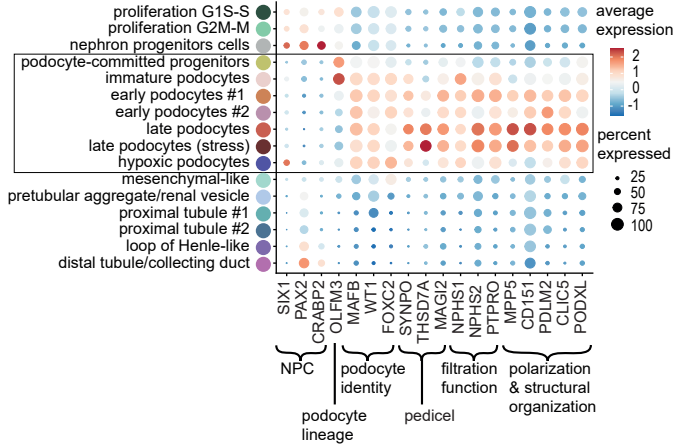

**c** PTA / RV & tubular epithelial cell canonical markers

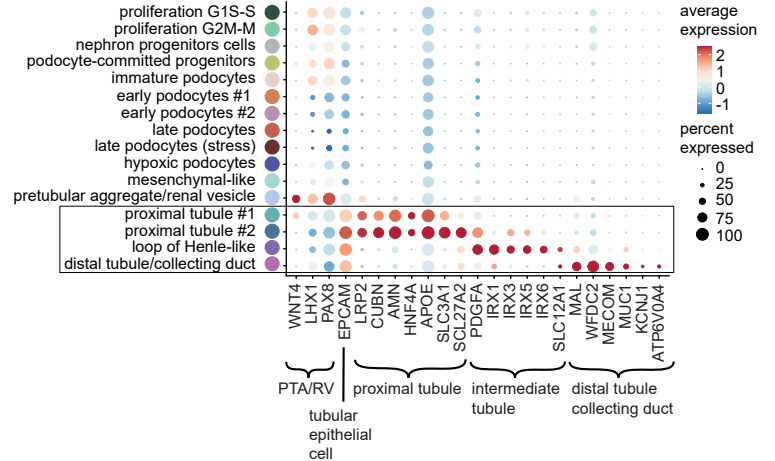

**d** Nephron cells - proliferative clusters

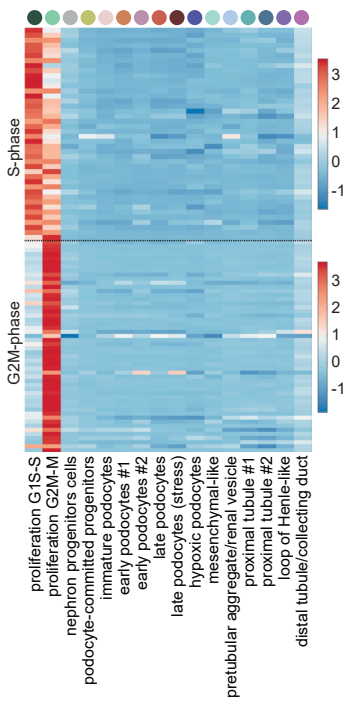

**e** Podocytes - hypoxic cluster

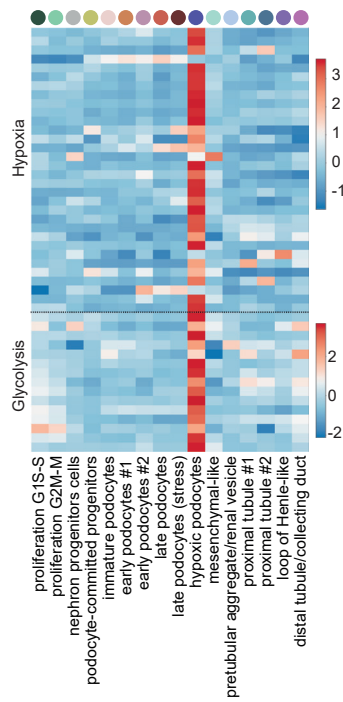

**f** Mesenchymal cell canonical markers

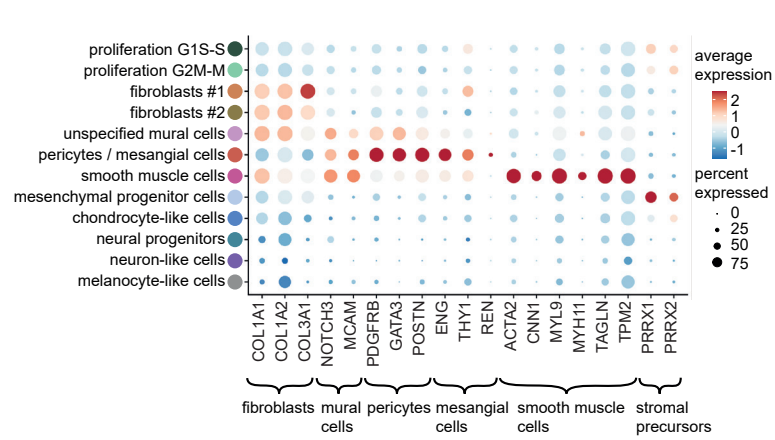

**g** Total number of interactions and interaction strength in UnTx and Tx organoids

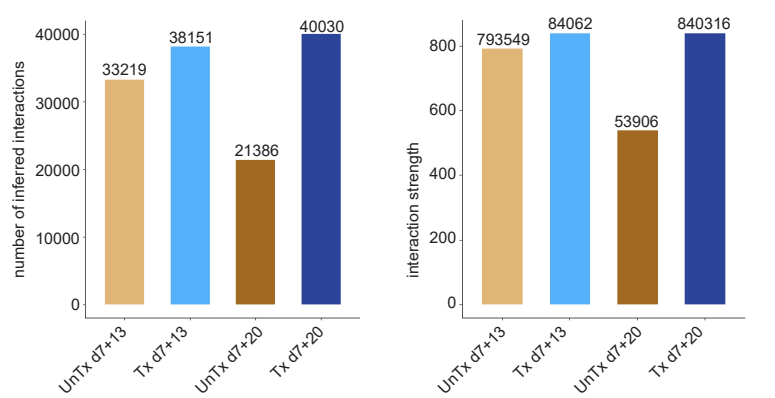

**Supplementary figure 2 – Selection of high quality organoid cells and subclustering of nephron and mesenchymal cell types**

- a. UMAP visualization of (left) all human cells and selection of high-quality cells (high-quality cells: blue, low-quality cells and doublets: grey), and (right) number of detected genes per cell.
- b. Dot plot of canonical nephron progenitor cell (NPC) and podocyte markers used to characterize podocyte cluster identity. Dot size indicates proportion of cells in cluster expressing a gene, colour intensity indicates the level of expression
- c. Dot plot of canonical renal vesicle / pretubular aggregate (RV/PTA) and tubular epithelial cell markers used to characterize tubular epithelium cluster identity. Dot size indicates proportion of cells in cluster expressing a gene, colour intensity indicates the level of expression
- d. Expression-level scaled heatmap of S-phase and G2M-phase genes, upregulated in nephron proliferation clusters. Scale: z-score of the gene expression level.
- e. Expression-level scaled heatmap of hypoxia and glycolysis-related genes, upregulated in the hypoxic podocytes clusters. Scale: z-score of the gene expression level.
- f. Dot plot of canonical mesenchymal cell markers used to characterize cluster identity. Dot size indicates proportion of cells in cluster expressing a gene, colour intensity indicates the level of expression
- g. Bar plot of the total number of inferred interactions (left) and total interaction strength (right) in transplanted and untransplanted organoids at different timepoints (d7+13 and d7+20).

# Supplementary figure 3

**a** Chicken cells

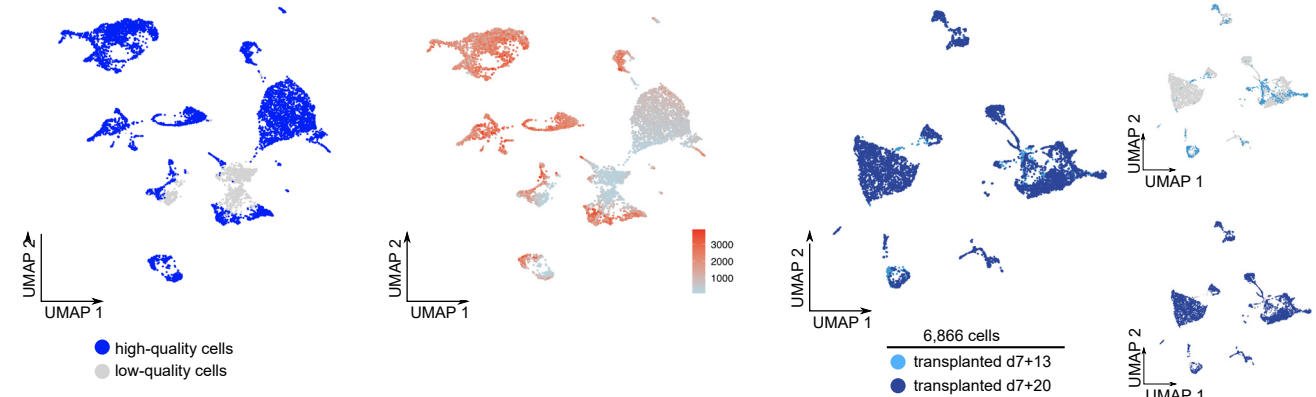

**b**

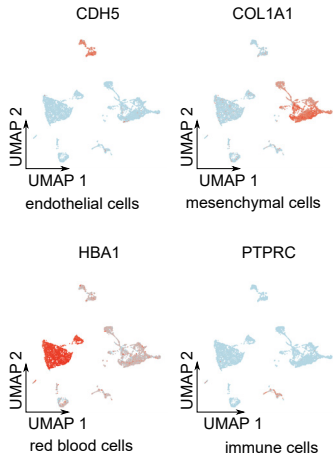

**c**

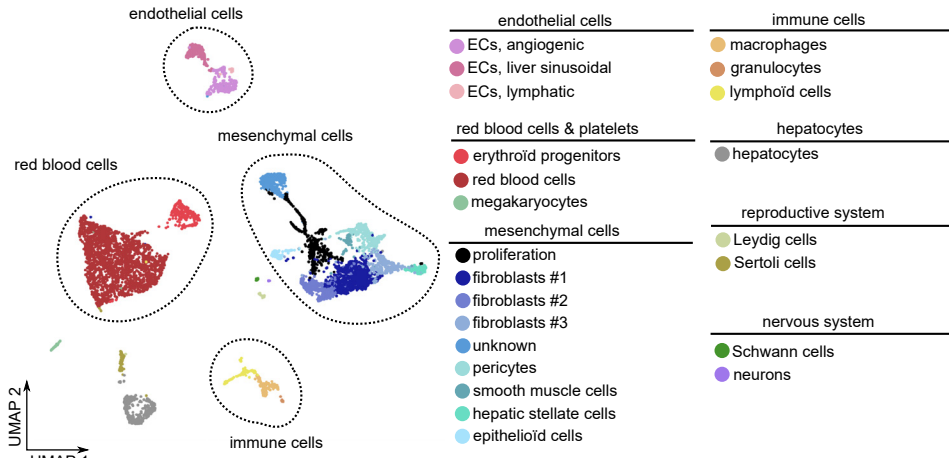

**d**

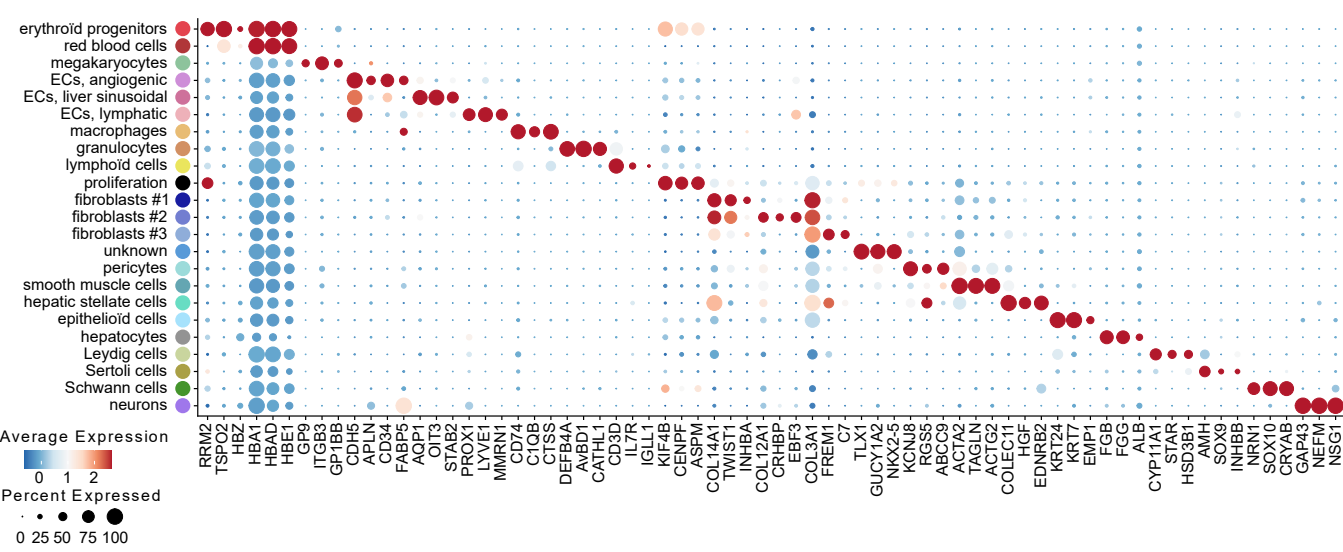

### Supplementary figure 3 –Selection and subclustering of high-quality chicken cells

- a. UMAP visualization of all chicken cells color-coded by (left) cell quality (high= blue, low= grey), (middle) number of detected genes per cell. (Right) UMAP visualization of a total of 6,866 high-quality chicken cells from transplanted kidney organoids color-coded by timepoint condition (857 cells from d7+13, 6,009 cells from d7+20). Note that these cells are partly derived from the organoid itself and partly from chicken tissue attached to the organoid.
- b. UMAP visualization of all high-quality chicken cells, color-coded by the expression level of *CDH5*, *COL1A1*, *HBA1*, and *PTPRC* genes, canonical markers for endothelial cells, mesenchymal cells, red blood cells and immune cells (red: high expression level, blue: low expression level).
- c. UMAP visualization of all high-quality chicken cells, color-coded by identified chicken cell clusters: endothelial cells (n=3 clusters), red blood cells & platelets (n=3 clusters), mesenchymal cells (n=9 clusters), immune cells (n=3 clusters), hepatocyte (n=1 cluster), cells from the reproductive system (n=2 clusters) and cells from the nervous system (n=2 clusters).
- d. Dot plot representing canonical marker gene expression in chicken cell clusters. Dot size indicates proportion of cells in cluster expressing a gene, colour intensity indicates the level of expression.

Supplementary figure 4

a

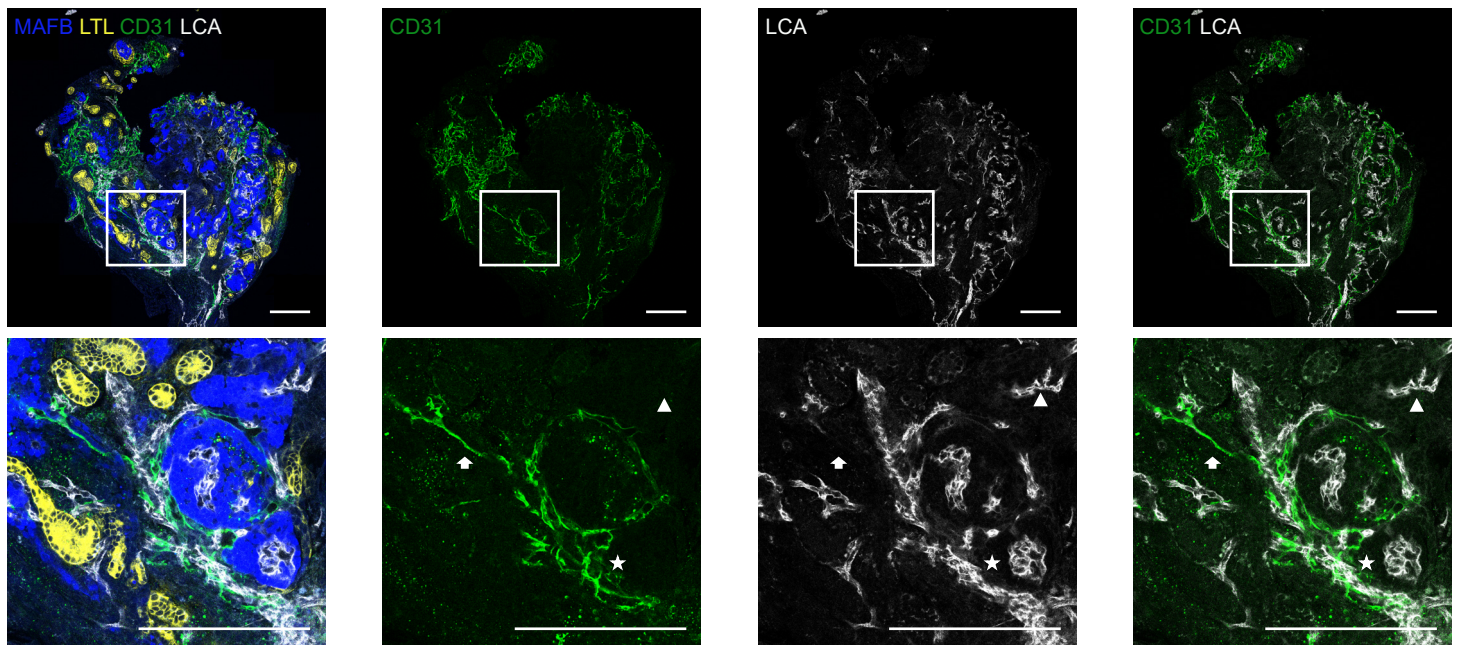

b Timeline of vascularization after transplantation

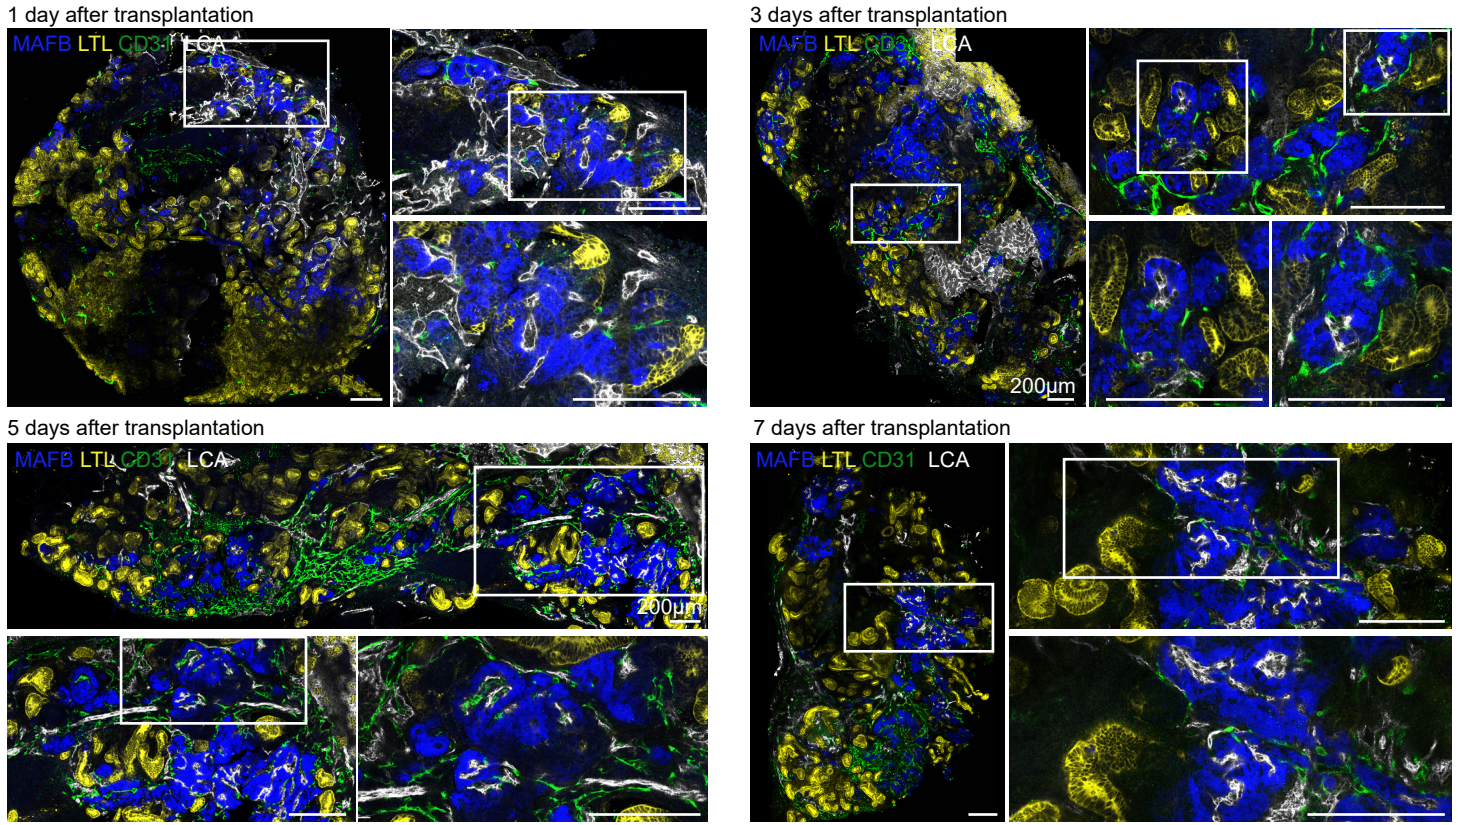

#### **Supplementary figure 4 – Origin of endothelial cells and timeline of vascularization**

- a. Combined staining for human CD31 (green) and injected LCA (white) demonstrates the presence of an extensive perfused vascular network in transplanted organoids d7+19-20. Three types of blood vessels can be distinguished: perfused human organoid derived endothelial cells, (CD31+, LCA+) unperfused human organoid derived endothelial cells (CD31+, LCA-), and perfused chicken derived endothelial cells (CD31-, LCA+). Examples are marked in the magnifications of the boxed areas by a star (perfused human), arrow (unperfused human), and arrowhead (perfused chicken). Scalebar 200µm.
- b. Timeline demonstrating the rapid vascularization of kidney organoids upon transplantation. On day 1 after transplantation, blood vessels have entered the organoid, but not the glomerular structures. On day 3, some glomerular structures have become vascularized, which increases markedly on day 5 and 7 after transplantation. Magnifications of the boxed areas are displayed. Scalebar 200µm.



# Supplementary figure 5

**a** Expression of Angiopoietin ligands and receptors by organoid cell clusters

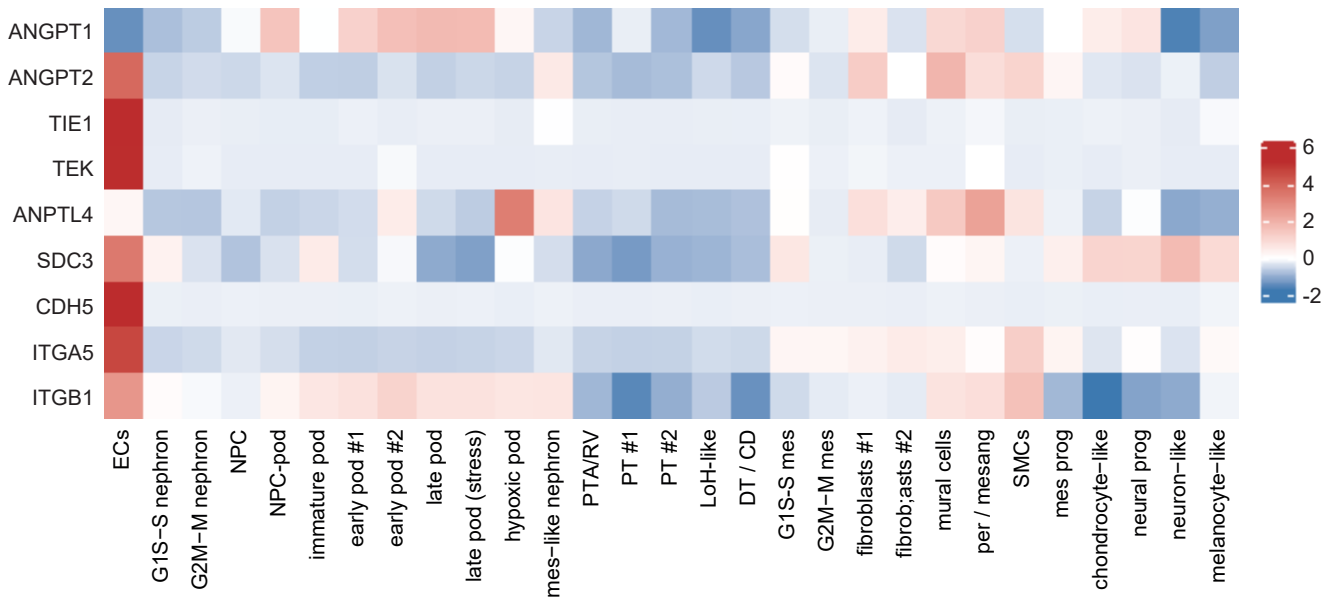

**b** Expression of PDGF ligands and receptors by organoid cell clusters

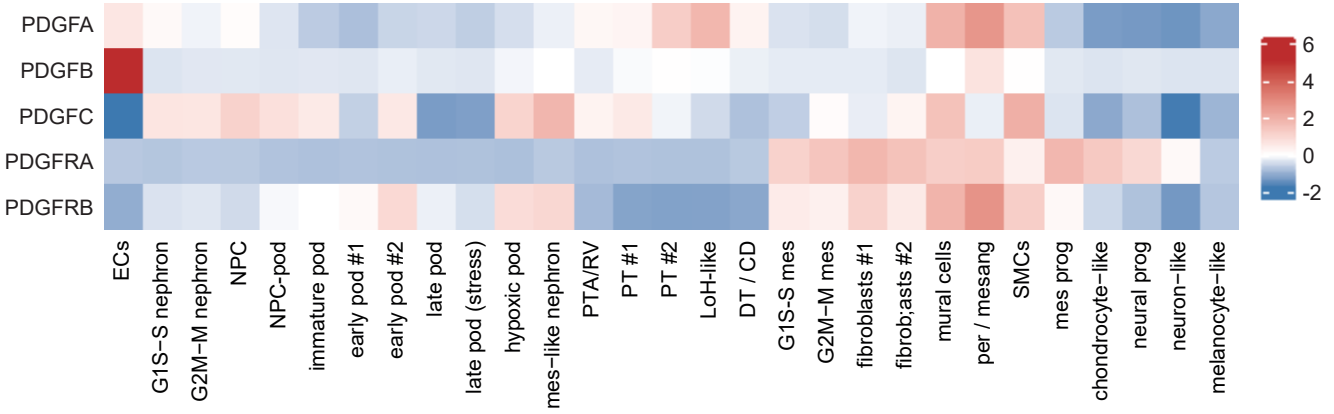

**c** Expression of VEGF ligands and receptors by organoid cell clusters

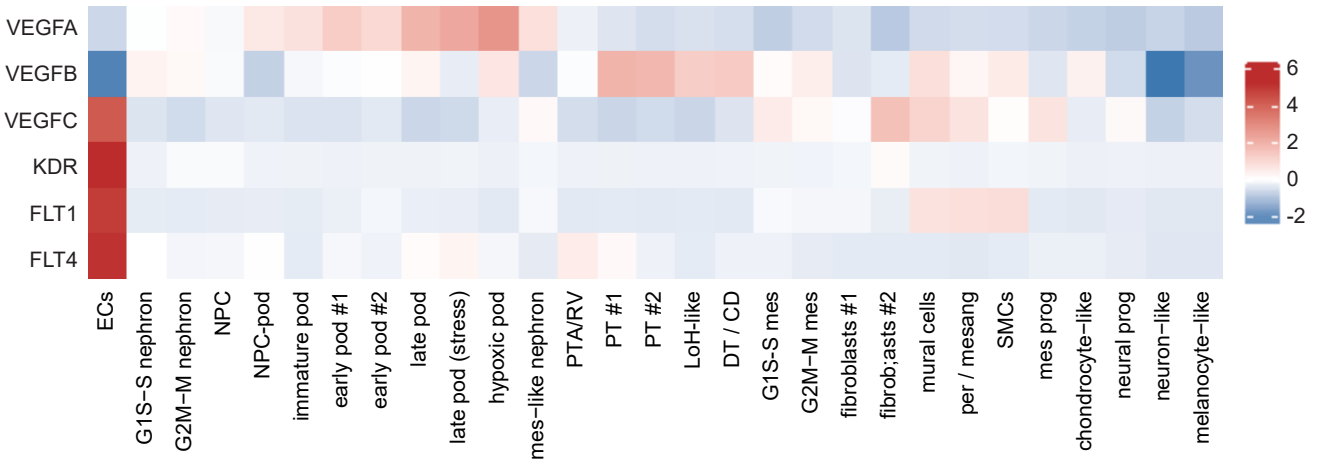

**Supplementary figure 5 – Gene expression of ANGPT, PDGF and VEGF ligands and receptors**

- a. Expression-level scaled heatmap of genes encoding angiopoietin ligands and receptors in organoid cell clusters (cells from all conditions pooled). Scale: z-score of the gene expression level.
- b. Expression-level scaled heatmap of genes encoding PDGF ligands and receptors in organoid cell clusters (cells from all conditions pooled). Scale: z-score of the gene expression level.
- c. Expression-level scaled heatmap of genes encoding VEGF ligands and receptors in organoid cell clusters (cells from all conditions pooled). Scale: z-score of the gene expression level.

# Supplementary figure 6

## a GSEA Late podocyte cluster transplanted d7+20 vs untransplanted d7+20

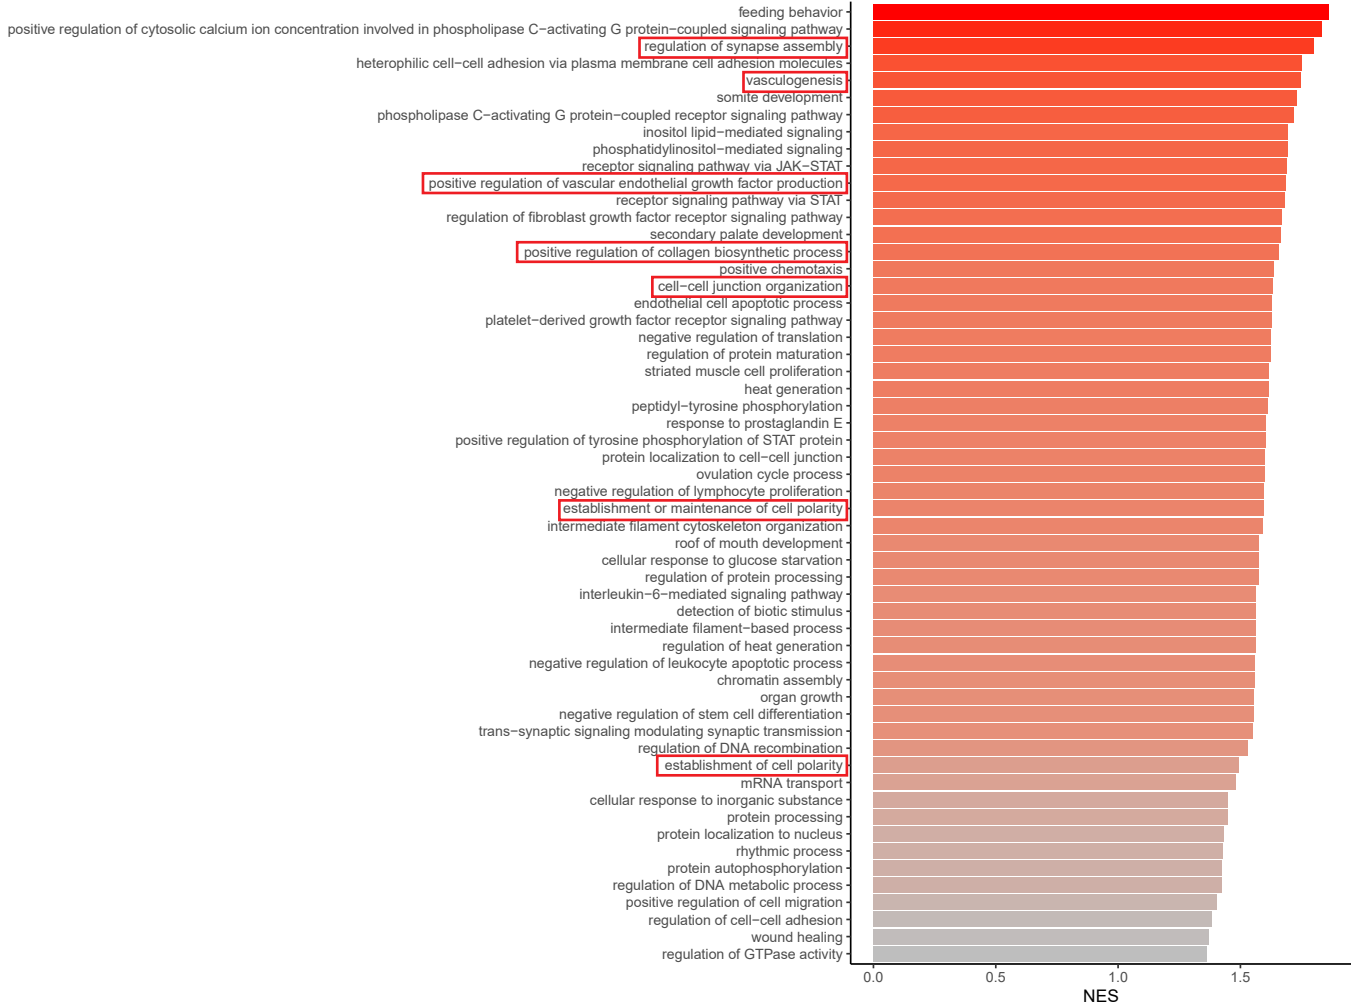

## b GSEA All tubular epithelial cells transplanted d7+20 vs untransplanted d7+20

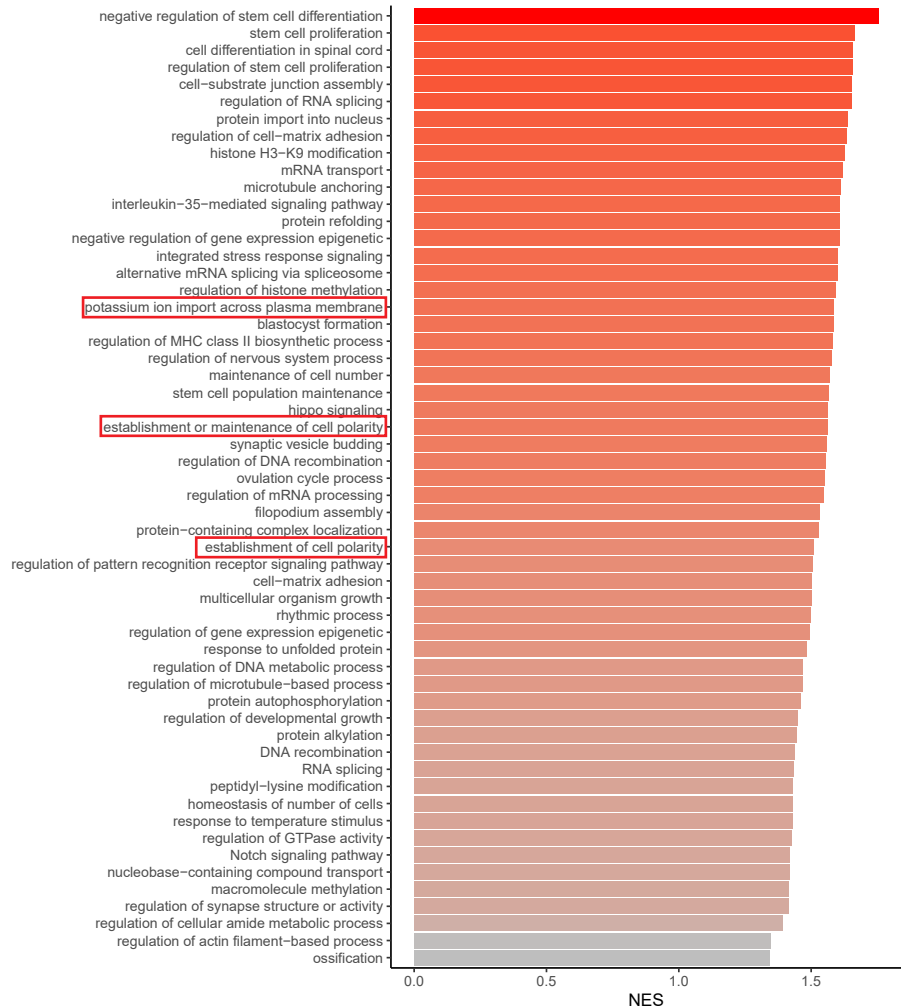

**Supplementary figure 6 – Gene set enrichment analysis podocytes and tubular epithelial cells**

- a. Gene set enrichment analysis (GSEA) for late podocyte cluster in transplanted d7+20 versus untransplanted d7+20 organoids. NES: normalized enrichment score. Source data are provided as a Source Data file.
- b. Gene set enrichment analysis (GSEA) for all tubular epithelial cells in transplanted d7+20 versus untransplanted d7+20 organoids. NES: normalized enrichment score. Source data are provided as a Source Data file.

## Supplementary table

**Supplementary table 1 - Antibodies used for immunofluorescence analysis**

| Antibody                                                                          | Type       | Supplier                 | Catalog number | Dilution |
|-----------------------------------------------------------------------------------|------------|--------------------------|----------------|----------|
| <i>Primary antibodies and lectins</i>                                             |            |                          |                |          |
| Nephrin - Sheep anti-Human (NPHS1)                                                | Polyclonal | R&D Systems              | AF4269         | 1:100    |
| CD31 - Mouse anti-Human                                                           | Monoclonal | BD biosciences           | 555444         | 1:100    |
| E-cadherin - Mouse anti-Human (ECAD)                                              | Monoclonal | BD biosciences           | 610181         | 1:300    |
| Lotus Tetragonolobus Lectin (LTL)                                                 | -          | Vector Laboratories      | B-1325         | 1:300    |
| Lens Culinaris Agglutinin rhodamine (LCA)                                         | -          | Vector Laboratories      | RL-1042-5      | 1:1      |
| Platelet-Derived Growth Factor Receptor $\beta$ Mouse anti-Human (PDGFR $\beta$ ) | Monoclonal | R&D Systems              | MAB1263        | 1:50     |
| <i>Secondary Antibodies</i>                                                       |            |                          |                |          |
| Alexa Fluor 568 - Donkey anti-Sheep IgG                                           | Polyclonal | Thermo Fisher Scientific | A-21099        | 1:500    |
| Alexa Fluor 647 - Donkey anti-Sheep IgG                                           | Polyclonal | Thermo Fisher Scientific | A-21448        | 1:500    |
| Alexa Fluor 405 - Donkey anti-Mouse IgG                                           | Polyclonal | Abcam                    | ab175658       | 1:500    |
| Alexa Fluor 488 - Donkey anti-Mouse IgG                                           | Polyclonal | Thermo Fisher Scientific | A-21202        | 1:500    |
| Streptavidin Alexa Fluor 532 conjugate                                            | -          | Thermo Fisher Scientific | S11224         | 1:200    |
| Streptavidin Alexa Fluor 647 conjugate                                            | -          | Thermo Fisher Scientific | S21374         | 1:200    |

## Supplementary movies

### **Supplementary movie 1 – Z-stack of SBF-SEM dataset of a glomerular structure inside an untransplanted kidney organoid generated from iPSC-MAFB**

The full Z-stack of the SBF-SEM dataset that was used for the 3D reconstruction of the untransplanted glomerular structure demonstrated in Fig. 5B,C and Supplementary Movie 5 is shown. A cluster of podocytes surrounding a central cavity and encapsulated by a layer of parietal epithelial-like cells is visible.

### **Supplementary movie 2 – Z-stack of SBF-SEM dataset of a glomerular structure inside a transplanted kidney organoid generated from iPSC-MAFB**

The full Z-stack of the SBF-SEM dataset that was used for the 3D reconstruction of the transplanted glomerular structure demonstrated in Fig. 5B,C and Supplementary Movie 6 is shown. A perfused capillary containing erythrocytes as well as leukocytes is visible running along the side of the glomerular structure and invading it. The podocytes have reorganized around the capillary and a Bowman's space is visible between the podocyte and parietal epithelial-like cell layer.

### **Supplementary movie 3 – Z-stack of a second SBF-SEM dataset of a glomerular structure inside an untransplanted kidney organoid generated from iPSC-MAFB**

The full Z-stack of a second SBF-SEM dataset of an untransplanted glomerular structure is shown. Again, a cluster of podocytes encapsulated by a layer of parietal epithelial cell like cells is visible. In this glomerular structure, 2 cavities are present that connect to each other. Several other glomerular structures surround the one in the middle. The data set was acquired with SBF-SEM as described in the Materials and Methods section, with a pixel size of 15 nm, a dwell time of 3  $\mu$ s and a 50 nm slice

thickness. The sample size was 105 x 105 x 25  $\mu\text{m}$ , and the image size 7000 x 7000 pixels x 500 slices.

**Supplementary movie 4 – Z-stack of a second SBF-SEM dataset of a glomerular structure inside a transplanted kidney organoid generated from iPSC-MAFB**

The full Z-stack of a second SBF-SEM dataset of a transplanted glomerular structure is shown. Again, a perfused capillary is visible invading the glomerular structure, the podocytes have reorganized around the capillary and a Bowman's space is visible between the podocyte and parietal epithelial-like cell layer. The data set was acquired with a pixel size of 12 nm, a dwell time of 3,5  $\mu\text{s}$  and a 60 nm slice thickness. The sample size was 72 x 72 x 18.06  $\mu\text{m}$ , and the image size 6000 x 6000 pixels x 301 slices.

**Supplementary movie 5 – 3D reconstruction of SBF-SEM dataset of a glomerular structure inside an untransplanted organoid generated from iPSC MAFB**

360° view of the 3D reconstruction shown in Fig. 5 B,C of the SBF-SEM dataset of an untransplanted glomerular structure (Supplementary Movie 1).

**Supplementary movie 6 – 3D reconstruction of SBF-SEM dataset of a glomerular structure inside a transplanted organoid generated from iPSC-MAFB**

360° view of the 3D reconstruction shown in Fig. 5 B,C of the SBF-SEM dataset of a transplanted glomerular structure (Supplementary Movie 2).
